# Supplementary material
Source: Springer Nature journal article supplement (https://www.springermedizin.de/resource/supplementary/12913_2010_1722_MOESM1_ESM.pdf/9528828)

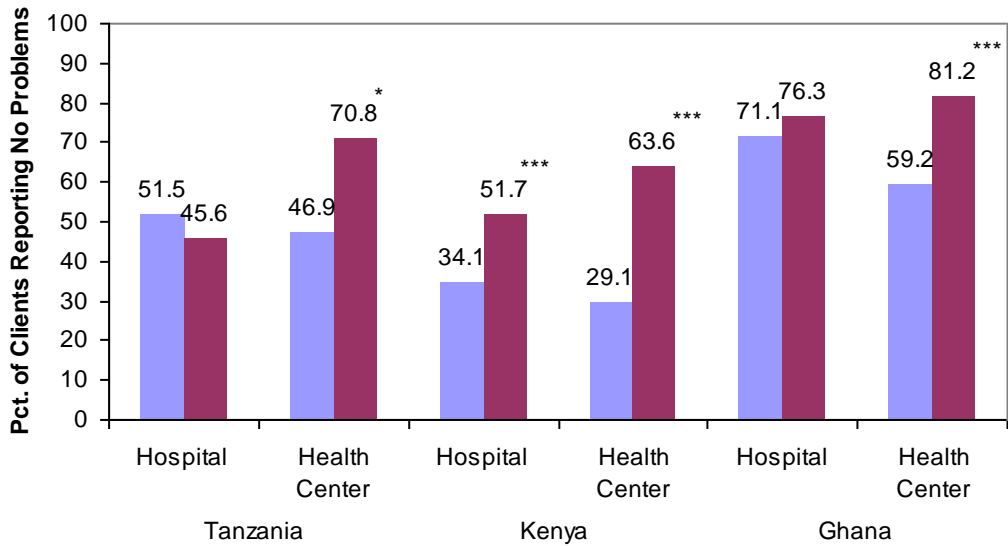

\*  $p < 0.05$ , \*\*  $p < 0.01$ , \*\*\*  $p < 0.00$

Supplement: MOESM1 [file 9528828]
